# Supplementary material
Source: publisher site journal article supplement (https://www.degruyterbrill.com/publication/isbn/9783805912815/downloadAsset/9783805912815_Inhaltsverzeichnis.pdf)
Supplement: Supplementary file 1 [file 9783805912815_Inhaltsverzeichnis.pdf]

# Inhaltsübersicht

|                                                          | Seite <sup>*</sup> |
|----------------------------------------------------------|--------------------|
| Vorwort _____                                            | IX                 |
| Allgemeines Schrifttum _____                             | XI                 |
| Buch 2 · Recht der Schuldverhältnisse                    |                    |
| Abschnitt 1 · Inhalt der Schuldverhältnisse              |                    |
| Titel 1 · Verpflichtung zur Leistung<br>§§ 255–292 _____ | 1                  |
| Titel 2 · Verzug des Gläubigers _____                    | 1029               |
| Sachregister _____                                       | 1101               |

---

\* Zitiert wird nicht nach Seiten, sondern nach Paragraph bzw Artikel und Randnummer; siehe dazu auch „Zitierweise“.
